# Supplementary material for: Definition of a New HLA B*52-Restricted Rev CTL Epitope Targeted by an HIV-1-Infected Controller
Source: MDPI journal article supplement (doi:10.3390/v15020567), 2023-02-18
Supplement: s1 [file s1]

## **Supplementary Materials**

**Supplementary Table S1.** Characteristics of study participants

**Supplementary Table S2.** Rev-RI8 recognition, immunological and virological parameters in study participants.

**Supplementary Table S3.** Sequence variants of the RI8 epitope within different HIV-1 subtypes.

**Supplementary Table S4.** Analysis of sequence variation within the RI8 epitope.

**Supplementary Table S1.** Characteristics of study participants

| Patients        | Age | Gender | Current CD4 | Current CD8 | Current viral load | Months on ART <sup>2</sup> | CDC-Stage |
|-----------------|-----|--------|-------------|-------------|--------------------|----------------------------|-----------|
| #1 <sup>1</sup> | 60  | m      | 928         | 439         | <20                | 0                          | A1        |
| #2              | 41  | m      | 838         | 645         | <20                | 64                         | B1        |
| #3              | 40  | m      | 351         | 594         | <20                | 27                         | B2        |
| #4              | 37  | m      | 714         | 438         | <20                | 84                         | A2        |
| #5              | 54  | m      | 929         | 422         | <20                | 119                        | A2        |
| #6              | 52  | m      | 1434        | 717         | <20                | 135                        | A1        |
| #7              | 46  | f      | 723         | 942         | <20                | 128                        | C3        |
| #8              | 37  | f      | 1097        | 627         | <20                | 27                         | A1        |
| #9              | 50  | f      | 952         | 328         | <20                | 65                         | B2        |
| #10             | 48  | f      | 1295        | 569         | <20                | 315                        | B2        |
| #11             | 44  | m      | 548         | 344         | <20                | 60                         | A1        |
| #12             | 53  | m      | 905         | 1149        | <20                | 164                        | A3        |
| #13             | 55  | f      | 386         | 772         | <20                | 42                         | C3        |
| #14             | 47  | f      | 395         | 997         | 40                 | 3                          | B2        |
| #15             | 52  | m      | 1096        | 1388        | <20                | 127                        | C3        |

<sup>1</sup> Controller #1 at the day of the ELISpot analysis with freshly isolated PBMCs (Figure 1),

<sup>2</sup> ART = antiretroviral therapy, m=male, f=female.

**Supplementary Table S2.** Rev-RI8 recognition, immunological and virological parameters in study participants.

| Patients        | RI8 <sup>1</sup> | Current CD4 | Current CD8 | Current viral load | Pre-ART CD4      | Pre-ART CD8      | Pre-ART viral load |
|-----------------|------------------|-------------|-------------|--------------------|------------------|------------------|--------------------|
| #1 <sup>2</sup> | y                | 928         | 439         | <20                | 928 <sup>3</sup> | 439 <sup>3</sup> | <20 <sup>3</sup>   |
| #2              | y                | 838         | 645         | <20                | 720              | 1009             | 7600               |
| #3              | y                | 351         | 594         | <20                | 329              | 1898             | 230000             |
| #4              | y                | 714         | 438         | <20                | 483              | 1435             | 57500              |
| #5              | y                | 929         | 422         | <20                | 263              | n/a <sup>2</sup> | 26000              |
| #6              | y                | 1434        | 717         | <20                | 809              | 809              | 35000              |
| #7              | n                | 723         | 942         | <20                | 5                | 940              | 140000             |
| #8              | n                | 1097        | 627         | <20                | 39               | 542              | 2500               |
| #9              | n                | 952         | 328         | <20                | 319              | 663              | 7000               |
| #10             | n                | 1295        | 569         | <20                | 336              | 700              | n/a <sup>4</sup>   |
| #11             | n                | 548         | 344         | <20                | 517              | 818              | 291650             |
| #12             | n                | 905         | 1149        | <20                | 108              | n/a <sup>4</sup> | 270000             |
| #13             | n                | 386         | 772         | <20                | 16               | 380              | 560000             |
| #14             | n                | 395         | 997         | 40                 | 254              | 863              | 140000             |
| #15             | n                | 1096        | 1388        | <20                | 192              | n/a <sup>4</sup> | 560000             |

<sup>1</sup> RI8: Recognition of Rev-RI8 peptide: y=yes, n=no, <sup>2</sup> controller #1 at the day of the ELISPOT analysis with freshly isolated PBMCs (Figure 1), <sup>3</sup> same values as current values as #1 was untreated. <sup>4</sup> data not available. Pre-ART: last value before start of antiretroviral treatment. Statistical analysis by Mann-Whitney-U-Test revealed significant higher pre-ART CD4 counts in subjects with recognition of Rev-RI8 in comparison to subjects without recognition of Rev-RI8 (p=0.012 with inclusion subject #1 and p= 0,0290, if #1 is omitted). There were no significant differences between Rev-RI8 responders and non-responders regarding current CD4 counts, current and pre-ART CD8 counts and viral loads, respectively (p=n.s.).

**Supplementary Table S3.** Sequence variants of the Rev-RI8 epitope within different HIV-1 subtypes.

| HIV-1 subtype | n | RQRQIRSI | HIV-1 subtype | n | RQRQIRSI |
|---------------|---|----------|---------------|---|----------|
| A             | 5 | -----D-- | D             | 4 | -----H-- |
|               | 2 | -----H-- |               | 2 | -----H-L |
|               | 2 | --N--D-- |               | 1 | G----H-- |
|               | 2 | -----D-L |               | 1 | -----N-- |
|               | 1 | --N--D-L |               | 1 | -----T-  |
|               | 1 | --Q--D-- |               | 1 | ---HLH-- |
|               | 1 | ---H-S-- |               |   |          |
|               | 1 | ----LN-- |               |   |          |
| B             | 1 | -----H-- | AE            | 2 | -----A-  |
|               | 1 | ---R-QE- |               | 2 | -----E-  |
|               | 1 | -----QTV |               | 1 | -----H-- |
|               | 1 | ---W--E- |               | 1 | ----V-AL |
|               | 1 | -----DL  |               | 1 | -----AL  |
|               | 1 | -----QT- |               | 1 | -----D-  |
|               | 1 | -----Q-V |               | 1 | Q--R-HAL |
|               | 1 | -----    |               | 1 | -----SA- |
|               | 1 | K--H--ML |               |   |          |
|               | 1 | -----K-- |               |   |          |
|               | 1 | -----A-  |               |   |          |
|               | 1 | ---H---- |               |   |          |
|               | 1 | -----Q-- |               |   |          |
|               | 1 | -----N-  |               |   |          |
|               | 1 | ---R--T- |               |   |          |
| C             | 6 | -----H-- | AG            | 2 | -----A-  |
|               | 2 | --K--H-- |               | 1 | --K---T- |
|               | 1 | --K----L |               | 1 | -----HT- |
|               | 1 | ---E-S-- |               | 1 | -----SA- |
|               | 1 | -----    |               | 1 | -----CA- |
|               | 1 | K-Q-LH-- |               | 1 | ---H--E- |
|               | 1 | -----E-  |               | 1 | -----AL  |
|               | 1 | -----HTL |               | 1 | -----HE- |
|               | 1 | QPKKTHLF |               |   |          |
| G             | 4 | -----H-- | F             | 4 | -----A-  |
|               | 2 | -----N-- |               | 3 | -----E-  |
|               | 2 | -----    |               | 2 | ----V-E- |
|               | 1 | -----E-  |               | 1 | -----AL  |

Indicated are Rev-RI8 epitope sequences from different HIV-1 subtypes obtained from the Los Alamos HIV Sequence Compendium 2019 [19]. Dashes indicated identical amino acids as in the Rev-RI8 epitope. Amino acids letters indicate the sequence variation within the Rev-RI8 epitope. n= frequency of the indicated sequences as presented in the sequence compendium.

**Supplementary Table S4.** Analysis of sequence variation within the Rev-RI8 epitope.

| HIV-1 subtype | n  | R | Q | R | Q | I | R  | S  | I |
|---------------|----|---|---|---|---|---|----|----|---|
| A             | 15 | 0 | 0 | 4 | 1 | 1 | 15 | 0  | 3 |
| B             | 15 | 1 | 0 | 0 | 5 | 0 | 7  | 9  | 4 |
| C             | 15 | 2 | 1 | 5 | 2 | 2 | 12 | 3  | 3 |
| D             | 10 | 1 | 0 | 0 | 1 | 1 | 9  | 1  | 2 |
| F             | 10 | 0 | 0 | 0 | 0 | 2 | 0  | 10 | 1 |
| G             | 9  | 0 | 0 | 0 | 0 | 0 | 6  | 1  | 0 |
| 01-AE         | 10 | 1 | 0 | 0 | 1 | 1 | 3  | 9  | 3 |
| 02-AG         | 9  | 0 | 0 | 1 | 1 | 0 | 4  | 9  | 1 |

Indicated are the number of amino acid variations within the different HIV-1 subtypes for each amino acid position of the Rev-RI8 epitope. The sequences were obtained from the Los Alamos HIV Sequence compendium 2019 [19]. n= number of sequences for each subtype.
